# Supplementary material
Source: PubMed Central journal article supplement (PMC4617833)
Supplement: NIHMS720454-supplement-1.pdf [file NIHMS720454-supplement-1.pdf]

## Welsh\_INVENTORY OF SUPPLEMENTARY INFORMATION

**1. Supplementary Figure 1:** Transgenic analysis of e926 sequence and conserved Pitx2 binding motifs. Relates to Figure 1 of main text.

**2. Supplementary Figure 2:** GRO-seq analysis of chicken Pitx2 locus from different developmental stages and tissue samples. Relates to Figure 2 of main text.

**3. Supplementary Figure 3:** dREG analysis of chicken Pitx2 locus from different developmental stages and tissue samples. Relates to Figure 2 of main text.

**4. Supplementary Figure 4:** Reproducibility of FISH data in biological replicates of chicken and mouse embryos, box plots of Playrr-Pitx2 FISH data in E10.5 WT and Pitx2<sup>-/-</sup> embryos, and TaqMan QRT of WT vs Pitx2<sup>-/-</sup> expression. Relates to Figures 4 and 5 of main text.

**5. Supplementary Figure 5:** Cumulative frequency curves of chicken and mouse FISH data

**6. Supplementary Figure 6:** Divergent *C4orf32* and *Enpep* expression in chicken vs. mouse DM, summary of *Pitx2* locus topology, and conservation of Pitx2 locus in human, mouse, chicken, and zebrafish. Relates to Figure 6 and discussion of main text.

**7. Supplementary Figure 7:** ChIP-seq data from mouse ES cells. Relates to Figure 6 of main text.

**8. Supplementary Figure Legends**
